# Supplementary material
Source: Springer Nature journal article supplement (https://www.springermedizin.de/resource/supplementary/12885_2013_4219_MOESM11_ESM.pdf/9465788)
Supplement: MOESM11 [file 9465788]

**a**

|         | No antibody | Erbitux®<br>(anti-ErbB1) | Herceptin®<br>(anti-ErbB2) |
|---------|-------------|--------------------------|----------------------------|
| U87Ctrl | 130.1 ± 4.4 | 98.3 ± 8.6 (*)           | 125.6 ± 7.9 (ns)           |
| U87dn   | 144.3 ± 3.3 | 104.3 ± 3.9 (*)          | 131.6 ± 8.8 (ns)           |

**b**

Division time in days (R value)

|                 | U87Ctrl     | U87dn       |
|-----------------|-------------|-------------|
| no treatment    | 2.73 (0.99) | 5.08 (1.00) |
| EREG            | 2.20 (1.00) | 2.86 (0.99) |
| EREG / Erbitux® | 3.08 (1.00) | 4.50 (1.00) |
| anti-EREG       | 3.12 (1.00) | 4.76 (0.99) |
